# Supplementary material for: Scattered coal is the largest source of ambient volatile organic compounds during the heating season in Beijing
Source: Copernicus journal article supplement (doi:10.5194/acp-2020-168), 2020-04-30
Supplement: Supplementary file 1 [file acp-2020-168-supplement.zip]

Archive with 2 entries (2 files):
- final-Supplementary materials.pdf
- final-Supplementary materials.xlsx
